# Supplementary material for: Understanding and controlling the release mechanism of Escherichia coli in double W1/O/W2emulsion globules in the presence of NaCl in the W2phase
Source: Royal Society of Chemistry journal article supplement (doi:10.1039/c5ra24469b), 2015-01-01
Supplement: c5ra24469b1.pdf [file c5ra24469b1.pdf]

# Understanding and controlling the release mechanism of *Escherichia coli* in double $W_1/O/W_2$ emulsion globules in the presence of NaCl in the $W_2$ phase

Hani El Kadri<sup>1</sup>, Tim Overton<sup>1,2</sup>, Serafim Bakalis<sup>1</sup>, [Kostas Gkatzionis](mailto:k.gkatzionis@bham.ac.uk)<sup>1,2\*</sup>

1. School of Chemical Engineering and 2. Institute of Microbiology & Infection  
University of Birmingham, United Kingdom

\* [k.gkatzionis@bham.ac.uk](mailto:k.gkatzionis@bham.ac.uk)

**Table S1.** The rotational speeds of the rotor used to homogenize the different formulations of  $W_1/O$  and  $W_1/O/W_2$ .

| $W/O_1$ percentage | Tween80 percentage | Rotor speed (rpm) for $W/O_1$ | Rotor speed (rpm) for $W_1/O/W_2$ |
|--------------------|--------------------|-------------------------------|-----------------------------------|
| 20                 | 1                  | 3000                          | 2000                              |
| 20                 | 5                  | 5000                          | 1800                              |
| 40                 | 1                  | 3000                          | 2300                              |
| 40                 | 5                  | 5000                          | 2600                              |

**Table S2.** The encapsulation efficiency (%) of *E. coli*-GFP and D (4,3) of different  $W_1/O/W_2$  emulsions. Results are taken from a minimum of 3 independent experiments.

| DE Formulations              | 20% $W_1$ , 1% Tw80 | 20% $W_1$ , 5% Tw80 | 40% $W_1$ , 1% Tw80 | 40% $W_1$ , 5% Tw80 |
|------------------------------|---------------------|---------------------|---------------------|---------------------|
| Encapsulation efficiency (%) | 99.95±0.02          | 99.9±0.03           | 99.93±0.02          | 99.9±0.09           |
| D (4, 3)                     | 67±1.37             | 64.1±0.85           | 70.9±0.17           | 70±1                |

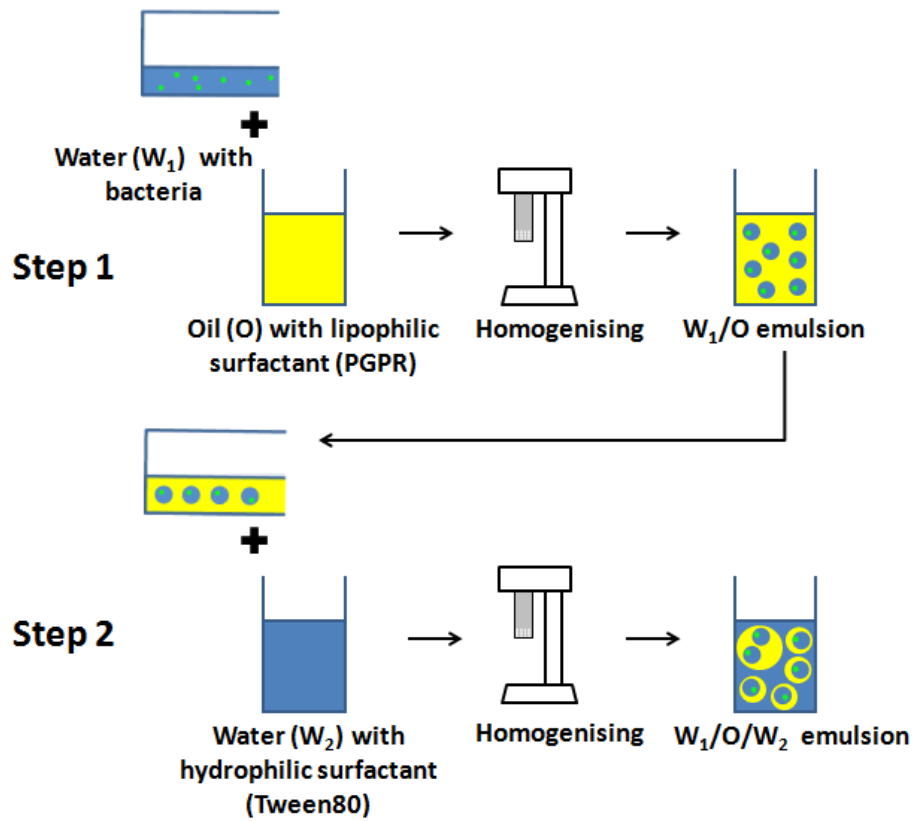

**Figure S1.** Schematic illustration of the two-step emulsification of a  $W_1/O/W_2$  emulsions and encapsulation of bacteria.

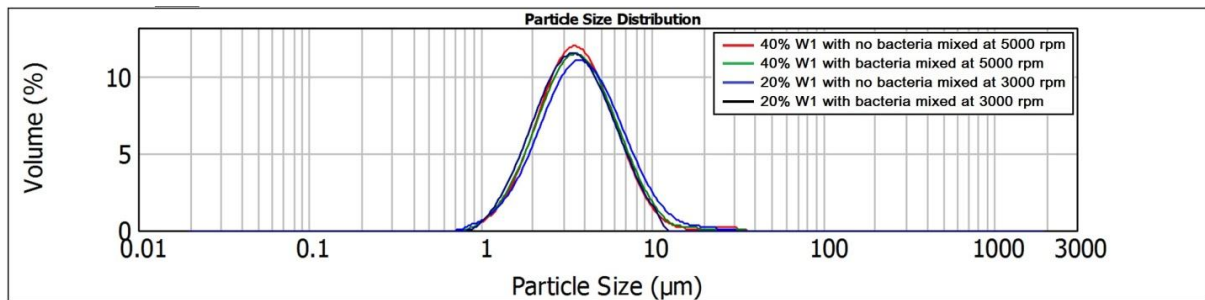

**Figure S2.** Particle size [D (4, 3)] analysis of the  $W_1$  droplets from  $W_1/O$  emulsion.  $W_1/O$  emulsion is prepared with 20% or 40%  $W_1$  with or without bacteria stabilized with 2% lipophilic surfactant. Measurements were taken at refractive index of 1.33.

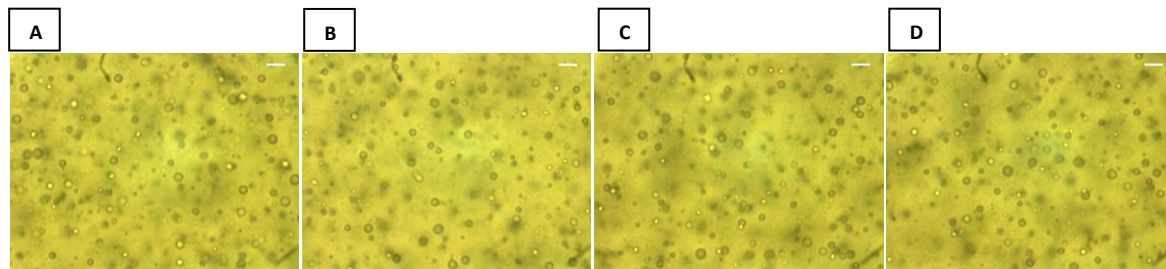

**Figure S3.** Optical images of  $W_1/O$  emulsions.  $W_1/O$  emulsions were prepared with water ( $W_1$ ) volume percentage of 20% or 40% with or without bacteria and stabilized with 2% PGPR. The formulations were as follows: A) 40%  $W_1$  with no bacteria mixed at 5000rpm; B) 40%  $W_1$  with bacteria mixed at 5000 rpm; C) 20%  $W_1$  with no bacteria mixed at 3000 rpm; D) 20%  $W_1$  with bacteria mixed at 3000rpm. Scale bar: 10 $\mu$ m.

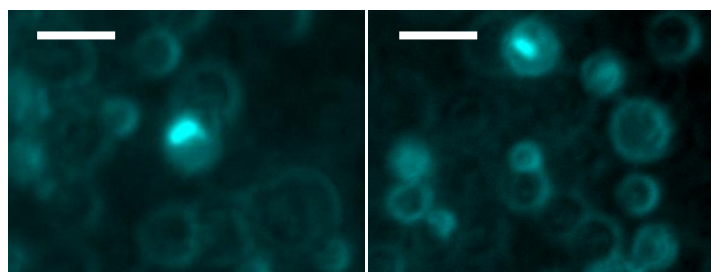

**Figure S4.** Fluorescent images of  $W_1$  droplets encapsulating GFP-*E.coli* within a  $W_1/O$  emulsion. Scale bar: 5  $\mu$ m.

**Video S1.** Optical video-microscopy showing oil globule bursting and release of  $W_1$  droplets into  $W_2$  after adding NaCl in  $W_2$ . The  $W_1/O/W_2$  emulsion was prepared with inner  $W_1$  phase volume percentage of 40% containing bacteria and stabilized with 1% Tween80 containing 0.085 M NaCl in the  $W_2$  phase.

**Video S2.** Fluorescence video-microscopy showing bursting of oil globule and release of *E. coli*-GFP after altering the osmotic balance. The double emulsion was prepared with inner  $W_1$  phase volume percentage of 40% containing bacteria and stabilized with 1% Tween80 containing 0.085 M NaCl in the  $W_2$  phase.

**Video S3.** Fluorescence video-microscopy showing *E. coli*-GFP cells located within oil globules after loss of  $W_1$  phase with no bursting of the oil globules occurring after osmotic balance alteration. The  $W_1/O/W_2$  emulsion was prepared with inner  $W_1$  phase volume percentage of 20% containing bacteria and stabilized with 5% Tween 80 containing 0.085 M NaCl in the  $W_2$  phase.

**Video S4.** Fluorescence video-microscopy showing *E. coli*-GFP cells located within two oil globules before and after coalescing with each other during loss of  $W_1$  phase due to the presence of NaCl in  $W_2$ . The  $W_1/O/W_2$  emulsion was prepared with inner  $W_1$  phase volume percentage of 40% containing bacteria and stabilized with 1% Tween 80 containing 0.085 M NaCl in the  $W_2$  phase.

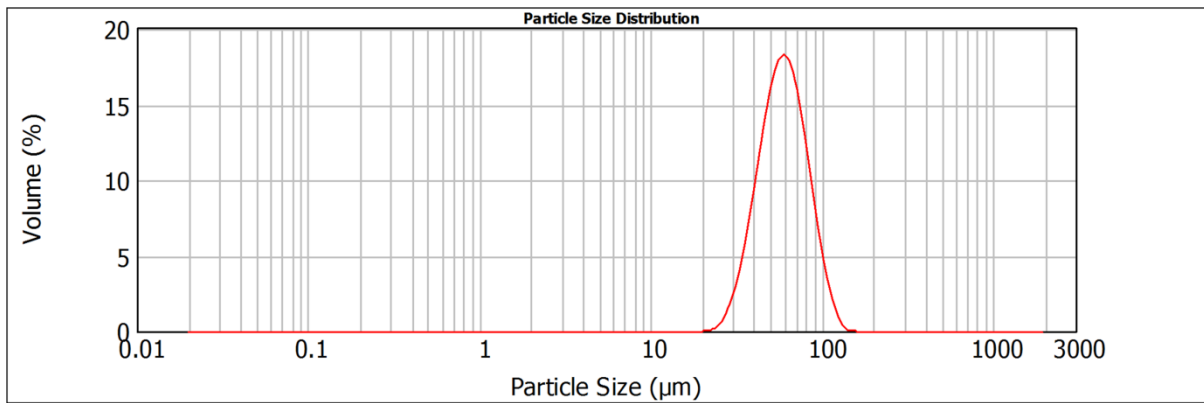

**Figure S5.** Particle size [D (4, 3)] analysis of the oil globules from freshly made  $W_1/O/W_2$  emulsion before altering the osmotic balance. The  $W_1/O/W_2$  emulsion is prepared with 40%  $W_1$  containing no bacteria stabilized with 1% Tween80 and no NaCl added to the  $W_2$  phase. Measurements were taken at refractive index of  $n_D^{22}$  1.396.

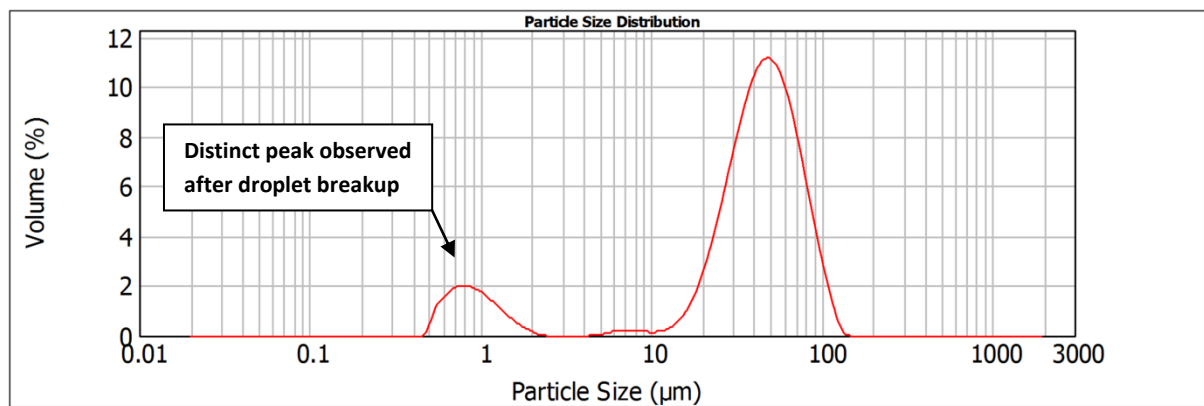

**Figure S6.** Particle size [D (4, 3)] analysis of oil globules from  $W_1/O/W_2$  double emulsion after altering the osmotic balance. The  $W_1/O/W_2$  emulsion is prepared with 40%  $W_1$  containing no bacteria stabilized with 1% Tween80 and 0.085 M NaCl added to the  $W_2$  phase. Measurements were taken at refractive index of  $n_D^{22}$  1.396.

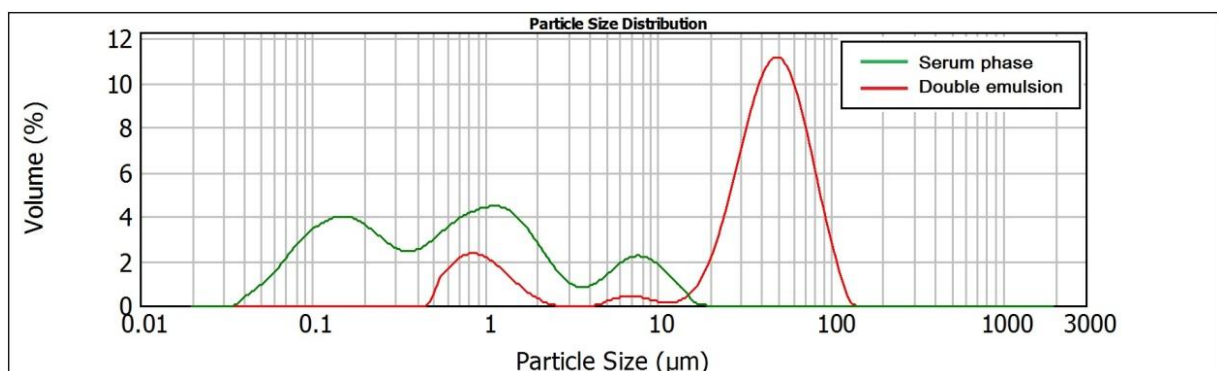

**Figure S7.** Particle size [D (4, 3)] analysis of  $W_1/O$  globules of serum phase and  $W_1/O/W_2$  emulsion after altering the osmotic balance. The  $W_1/O/W_2$  emulsion is prepared with 40%  $W_1$  containing no bacteria stabilized with 1% Tween80 and 0.085 M NaCl in the  $W_2$  phase. Measurements were taken at refractive index of  $n_D^{22}$  1.396.

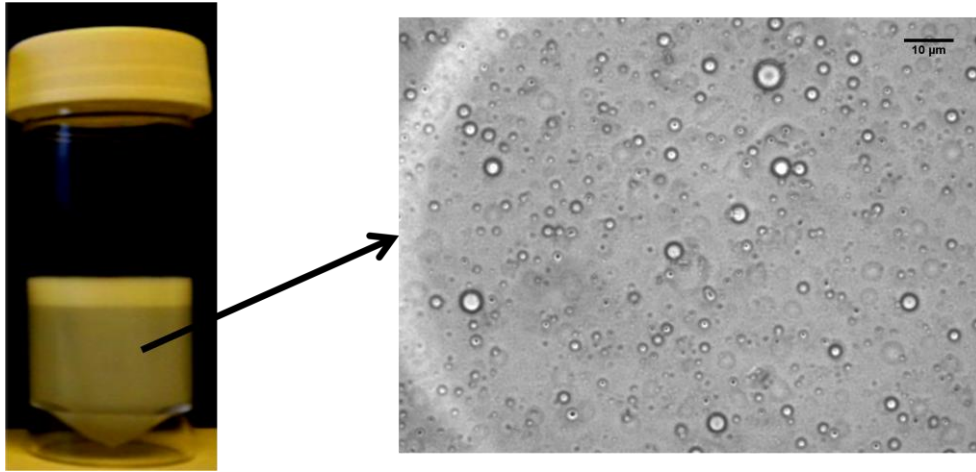

**Figure S8.** Optical observation of the serum phase.  $W_1$  droplets persisted in the serum phase after adding 0.085 M NaCl. Scale bar = 10  $\mu\text{m}$ .
